# Supplementary material for: Stabilizing effects of cations on lipases depend on the immobilization protocol
Source: Royal Society of Chemistry journal article supplement (doi:10.1039/c5ra18344h), 2015-01-01
Supplement: c5ra18344h1.pdf [file c5ra18344h1.pdf]

Ester

Acid

Ester

Acid
