# Supplementary material for: Stabilizing effects of cations on lipases depend on the immobilization protocol
Source: Royal Society of Chemistry journal article supplement (doi:10.1039/c5ra18344h), 2015-01-01
Supplement: c5ra18344h3.pdf [file c5ra18344h3.pdf]

## Supporting information.

### Figure Legends

Figure 1 S. Inactivation of different OC preparations (TLL: A. CALA:B and LU:C )in the presence of different salts. The inactivation was carried out at pH 7 at 73°C (TLL), 80°C (CALA) or 45°C (LU). Circles: Enzymes incubated in 5 mM Tris ; Rhombus: enzymes incubated in 5 mM Tris/5 mM Cl<sub>2</sub>Ca; Squares: enzymes incubated in 5 mM Tris/5 mM Cl<sub>2</sub>Mn; Triangles: enzymes incubated in 5 mM Tris/5 mM Cl<sub>2</sub>Mg

| Biocatalyst | Additional salt |                    |                    |                    |       |      |
|-------------|-----------------|--------------------|--------------------|--------------------|-------|------|
|             | None            | Cl <sub>2</sub> Ca | Cl <sub>2</sub> Mn | Cl <sub>2</sub> Mg | ClNa  | ClK  |
| RML         | 100             | 99±4               | 102±5              | 100±6              | 93±8  | 97±3 |
| OC-RML      | 100             | 102±5              | 105±4              | 103±3              | 104±4 | 96±5 |
| CRL         | 100             | 100±3              | 99±6               | 102±4              | 99±5  | 98±4 |
| OC-CRL      | 100             | 98±5               | 101±4              | 98±4               | 97±6  | 97±5 |

**Table 1S. Effect of different salts on the activity of free or OC-immobilized RML and CRL.**

Activities were determined as described in methods section, changing phosphate by Tris.
